# Supplementary material for: Passive Surveillance as a Key Tool for African Swine Fever Eradication in Wild Boar: A Protocol to Find Carcasses Tested and Validated in the Mediterranean Island of Sardinia
Source: MDPI journal article supplement (doi:10.3390/v16010136), 2024-01-18
Supplement: s1 [file s1]

# ASF

## African swine fever

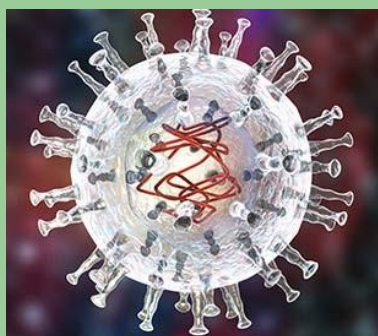

### Veterinary Service

Sassari tel. 079.2062813  
Nuoro tel. 0784.240010  
Oristano tel. 0783.317767  
Cagliari tel. 070.6092705

**African Swine Fever (ASF) is a highly contagious disease of domestic pigs and wild boars. There is no vaccine to fight it. It is not a danger to human health but is a danger to our agricultural economy leading to severe economic losses**

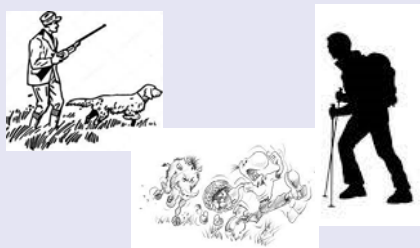

**Virus is highly resistant in the environment**

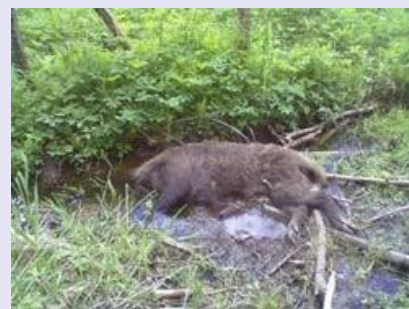

**We all play a key role in preventing the spread of African Swine Fever**

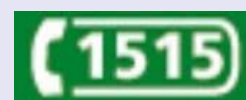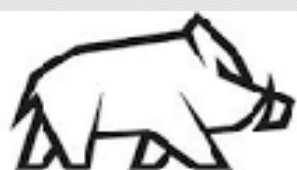

## Finding wild boar carcass

### What to do?

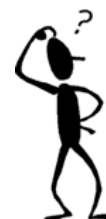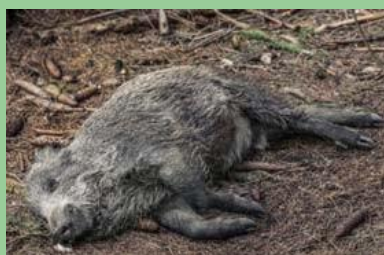

- 1) **Do not touch the carcass**
- 2) **Call the ASSL Veterinary Service immediately**
- 3) **Store your position on your mobile phone**
- 4) **Take a photo**

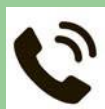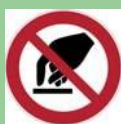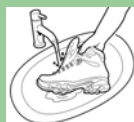

## RESPECT GENERAL PRECAUTIONS

**Report any suspected cases to the Veterinary Service**

**Don't touch  
Don't move the carcass**

**Disinfect your shoes before getting into the car**
